# Supplementary material for: Combinatorial mutagenesis of rapidly-evolving residues yields super-restrictor antiviral proteins
Source: bioRxiv or medRxiv preprint supplement (doi:10.1101/557264), 2019-08-12
Supplement: Supplementary file [file media-5.pdf]

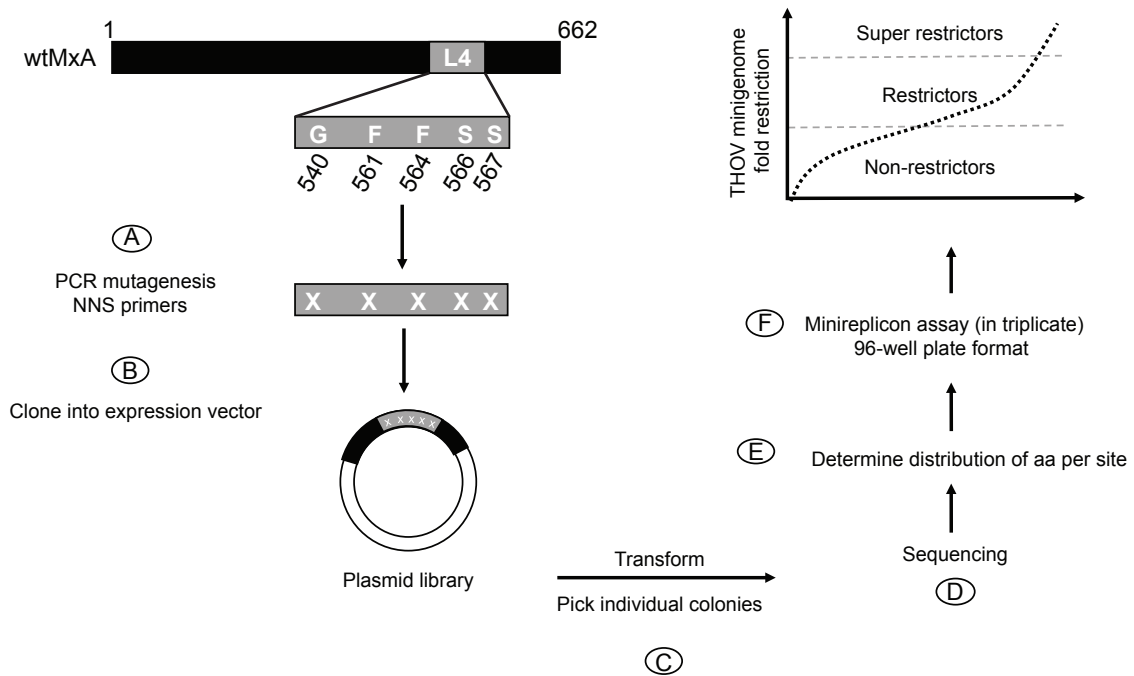

Figure S1
